# Supplementary material
Source: PubMed Central journal article supplement (PMC8605038)
Supplement: NIHMS1723443-supplement-Supplemental_Material.pdf [file NIHMS1723443-supplement-Supplemental_Material.pdf]

PERSON-SPECIFIC AFFECT COMPLEXITY

Supplementary Table 1. Fit Indices for Person-Specific Exploratory and Confirmatory Models

| Individual | Confirmatory Model Fit |      |      | Factor Solution |
|------------|------------------------|------|------|-----------------|
|            | RMSEA                  | CFI  | SRMR |                 |
| 1          | 0.01                   | 0.97 | 0.08 | 3 Factors       |
| 2          | 0.00                   | 0.96 | 0.09 | 4 Factors       |
| 3          | 0.04                   | 0.96 | 0.08 | 5 Factors       |
| 4          | 0.01                   | 0.99 | 0.05 | 5 Factors       |
| 5          | 0.03                   | 0.97 | 0.07 | 4 Factors       |
| 6          | 0.04                   | 0.95 | 0.08 | 6 Factors       |
| 7          | 0.05                   | 0.98 | 0.09 | 8 Factors       |
| 8          | 0.01                   | 0.96 | 0.07 | 3 Factors       |
| 9          | 0.04                   | 0.98 | 0.14 | 6 Factors       |
| 10         | 0.06                   | 0.97 | 0.12 | 5 Factors       |
| 11         | 0.05                   | 0.98 | 0.07 | 4 Factors       |
| 12         | 0.00                   | 0.99 | 0.09 | 7 Factors       |
| 13         | 0.02                   | 0.99 | 0.05 | 6 Factors       |
| 14         | 0.04                   | 0.98 | 0.09 | 5 Factors       |
| 15         | 0.00                   | 1.00 | 0.06 | 6 Factors       |
| 16         | 0.00                   | 1.00 | 0.07 | 8 Factors       |
| 17         | 0.00                   | 1.00 | 0.07 | 8 Factors       |
| 18         | 0.06                   | 0.97 | 0.16 | 2 Factors       |
| 19         | 0.00                   | 0.99 | 0.08 | 8 Factors       |
| 20         | 0.02                   | 0.96 | 0.10 | 7 Factors       |
| 21         | 0.06                   | 0.98 | 0.15 | 5 Factors       |
| 22         | 0.01                   | 0.97 | 0.08 | 7 Factors       |
| 23         | 0.03                   | 0.99 | 0.10 | 8 Factors       |
| 24         | 0.00                   | 0.98 | 0.07 | 5 Factors       |
| 25         | 0.05                   | 0.97 | 0.12 | 7 Factors       |
| 26         | 0.07                   | 0.97 | 0.08 | 6 Factors       |
| 27         | 0.02                   | 0.97 | 0.12 | 5 Factors       |
| 28         | 0.00                   | 0.99 | 0.09 | 7 Factors       |
| 29         | 0.04                   | 0.98 | 0.10 | 6 Factors       |
| 30         | 0.00                   | 1.00 | 0.07 | 5 Factors       |
| 31         | 0.00                   | 1.00 | 0.07 | 3 Factors       |
| 32         | 0.03                   | 0.98 | 0.06 | 5 Factors       |
| 33         | 0.00                   | 0.96 | 0.05 | 6 Factors       |
| 34         | 0.00                   | 0.96 | 0.09 | 3 Factors       |
| 35         | 0.00                   | 1.00 | 0.08 | 8 Factors       |
| 36         | 0.07                   | 0.97 | 0.20 | 5 Factors       |
| 37         | 0.00                   | 0.97 | 0.06 | 4 Factors       |
| 38         | 0.03                   | 0.97 | 0.05 | 7 Factors       |
| 39         | 0.06                   | 0.97 | 0.08 | 5 Factors       |
| 40         | 0.12                   | 0.95 | 0.06 | 5 Factors       |
| 41         | 0.05                   | 0.97 | 0.11 | 6 Factors       |
| 42         | 0.05                   | 0.98 | 0.13 | 4 Factors       |
| 43         | 0.00                   | 0.99 | 0.08 | 5 Factors       |
| 44         | 0.00                   | 0.99 | 0.08 | 4 Factors       |
| 45         | 0.00                   | 1.00 | 0.08 | 3 Factors       |
| 46         | 0.14                   | 0.95 | 0.06 | 4 Factors       |
| 47         | 0.06                   | 0.97 | 0.05 | 5 Factors       |
| 48         | 0.03                   | 0.97 | 0.06 | 6 Factors       |
| 49         | 0.06                   | 0.95 | 0.11 | 6 Factors       |
| 50         | 0.07                   | 0.98 | 0.05 | 5 Factors       |
| 51         | 0.06                   | 0.95 | 0.05 | 5 Factors       |
| 52         | 0.06                   | 0.91 | 0.09 | 7 Factors       |
| 53         | 0.06                   | 0.95 | 0.08 | 5 Factors       |
| 54         | 0.06                   | 0.93 | 0.10 | 4 Factors       |
| 55         | 0.06                   | 0.96 | 0.05 | 5 Factors       |
| 56         | 0.07                   | 0.95 | 0.07 | 4 Factors       |
